# Changes in the Attitudes and Practices of Health & Social Care Professionals with Respect to Self-Care as a Result of the COVID-19 Pandemic (CAPPS)

---

Study ID:

Name of Principal Investigator: Dr Austen El-Osta  
Co-investigators: Dr Pete Smith  
Mr Aos Alaa  
Ms Immy Webber  
Ms Eva Riboli-Sasco  
Professor Azeem Majeed

# Crib Sheet Questions

- 1. Thank you for taking the time to speak with me today. Please can I confirm if I have your consent to taking part in this interview? If you consent, your responses will be recorded on the electronic consent form I sent you.**
2. What are your views on the benefits of moving to self-care as a primary mode of care?
3. How do you personally feel about self-care? Has COVID-19 changed your attitudes?
4. How do you feel the COVID-19 pandemic has changed the landscape of care/self-care (e.g., delivery of care, willingness of patient to self-care)?
5. What do you believe to be the main motivations and/or barriers for your patients/clients to self-care (or for self-care as a primary mode of care)?
6. How has the advent of COVID-19 changed your and/or your patients/clients use of technology, specifically with regards to self-care. What are the main barriers/drivers?
7. Do you believe the changes seen in attitudes to self-care to be permanent? Why?
8. What do you believe are the implications?
