# Supplementary material for: How has COVID-19 changed healthcare professionals’ attitudes to self-care? A mixed methods research study
Source: PLOS journal article supplement (doi:10.1371/journal.pone.0289067), 2023-07-24
Supplement: S1 (10.1371/journal.pone.0289067.s001) [file journal.pone.0289067.s001]

## Supplementary Table 1: Resources, competencies, technology and future

| RESOURCES AND COMPETENCIES                                                     |                    | Doctor    | Nurse     | Service   | Pharmacy  | SP/Other  | Total      | p-value |
|--------------------------------------------------------------------------------|--------------------|-----------|-----------|-----------|-----------|-----------|------------|---------|
|                                                                                |                    |           |           |           |           |           |            | 0.13    |
| I have the resources & proficiency to promote self-care in my practice         | Strongly disagree  | 1 (2.1)   | 1 (2.3)   | 2 (4.8)   | 1 (0.8)   | 0 (0.0)   | 5 (1.7)    |         |
|                                                                                | Disagree           | 6 (12.5)  | 0 (0.0)   | 2 (4.8)   | 15 (12.7) | 4 (7.8)   | 27 (8.9)   |         |
|                                                                                | Neutral            | 9 (18.8)  | 7 (15.9)  | 4 (9.5)   | 14 (11.9) | 8 (15.7)  | 42 (13.9)  |         |
|                                                                                | Agree              | 29 (60.4) | 27 (61.4) | 21 (50.0) | 63 (53.4) | 25 (49.0) | 165 (54.5) |         |
|                                                                                | Strongly agree     | 3 (6.3)   | 9 (20.5)  | 13 (31.0) | 25 (21.2) | 14 (27.5) | 64 (21.1)  |         |
| My patients are adequately prepared/trained to self-care                       | Strongly disagree  | 4 (8.3)   | 2 (4.5)   | 3 (7.1)   | 6 (5.1)   | 1 (2.0)   | 16 (5.3)   |         |
|                                                                                | Disagree           | 26 (54.2) | 9 (20.5)  | 14 (33.3) | 31 (26.5) | 16 (32.0) | 96 (31.9)  |         |
|                                                                                | Neutral            | 11 (22.9) | 18 (40.9) | 15 (35.7) | 47 (40.2) | 21 (42.0) | 112 (37.2) |         |
|                                                                                | Agree              | 6 (12.5)  | 14 (31.8) | 8 (19.0)  | 31 (26.5) | 11 (22.0) | 70 (23.3)  |         |
|                                                                                | Strongly agree     | 1 (2.1)   | 1 (2.3)   | 2 (4.8)   | 2 (1.7)   | 1 (2.0)   | 7 (2.3)    |         |
| My /patients have the competency & resources to self-care                      | Strongly disagree  | 5 (10.4)  | 1 (2.3)   | 2 (4.9)   | 6 (5.1)   | 1 (2.0)   | 15 (5.0)   |         |
|                                                                                | Disagree           | 16 (33.3) | 9 (20.5)  | 13 (31.7) | 29 (24.6) | 9 (17.6)  | 76 (25.2)  |         |
|                                                                                | Neutral            | 15 (31.3) | 23 (52.3) | 15 (36.6) | 49 (41.5) | 23 (45.1) | 125 (41.4) |         |
|                                                                                | Agree              | 11 (22.9) | 10 (22.7) | 9 (22.0)  | 30 (25.4) | 16 (31.4) | 76 (25.2)  |         |
|                                                                                | Strongly agree     | 1 (2.1)   | 1 (2.3)   | 2 (4.9)   | 4 (3.4)   | 2 (3.9)   | 10 (3.3)   |         |
| There were sufficient resources available to promote self-care generally       | Strongly disagree  | 11 (22.9) | 0 (0.0)   | 3 (7.1)   | 6 (5.2)   | 2 (3.9)   | 22 (7.3)   |         |
|                                                                                | Disagree           | 16 (33.3) | 9 (20.9)  | 11 (26.2) | 31 (26.7) | 9 (17.6)  | 76 (25.3)  |         |
|                                                                                | Neutral            | 8 (16.7)  | 17 (39.5) | 7 (16.7)  | 23 (19.8) | 16 (31.4) | 71 (23.7)  |         |
|                                                                                | Agree              | 12 (25.0) | 14 (32.6) | 19 (45.2) | 48 (41.4) | 19 (37.3) | 112 (37.3) |         |
|                                                                                | Strongly agree     | 1 (2.1)   | 3 (7.0)   | 2 (4.8)   | 8 (6.9)   | 5 (9.8)   | 19 (6.3)   |         |
| There were sufficient resources available to promote self-care for coronavirus | Strongly disagree  | 6 (12.8)  | 3 (6.8)   | 3 (7.5)   | 6 (5.1)   | 3 (5.9)   | 21 (7.0)   |         |
|                                                                                | Disagree           | 12 (25.5) | 3 (6.8)   | 7 (17.5)  | 22 (18.6) | 9 (17.6)  | 53 (17.7)  |         |
|                                                                                | Neutral            | 9 (19.1)  | 15 (34.1) | 9 (22.5)  | 19 (16.1) | 9 (17.6)  | 61 (20.3)  |         |
|                                                                                | Agree              | 18 (38.3) | 20 (45.5) | 16 (40.0) | 60 (50.8) | 23 (45.1) | 137 (45.7) |         |
|                                                                                | Strongly agree     | 2 (4.3)   | 3 (6.8)   | 5 (12.5)  | 11 (9.3)  | 7 (13.7)  | 28 (9.3)   |         |
| HCP/PATIENT INTERACTION DYNAMICS & CHANGES AFTER PANDEMIC                      |                    |           |           |           |           |           |            | <0.001  |
| How has your relationship with your service users changed                      | Extremely negative | 4 (8.5)   | 0 (0.0)   | 0 (0.0)   | 0 (0.0)   | 1 (2.0)   | 5 (1.7)    |         |
|                                                                                | Slightly negative  | 14 (29.8) | 6 (13.6)  | 0 (0.0)   | 2 (1.7)   | 1 (2.0)   | 23 (7.6)   |         |
|                                                                                | No change          | 7 (14.9)  | 16 (36.4) | 9 (21.4)  | 19 (16.1) | 14 (27.5) | 65 (21.5)  |         |
|                                                                                | Slightly positive  | 18 (38.3) | 17 (38.6) | 25 (59.5) | 63 (53.4) | 19 (37.3) | 142 (47.0) |         |
|                                                                                | Extremely positive | 4 (8.5)   | 5 (11.4)  | 8 (19.0)  | 34 (28.8) | 16 (31.4) | 67 (22.2)  |         |
| How has your relationship with other professionals changed                     | Extremely negative | 0 (0.0)   | 0 (0.0)   | 0 (0.0)   | 2 (1.7)   | 0 (0.0)   | 2 (0.7)    |         |
|                                                                                | Slightly negative  | 9 (19.1)  | 4 (9.1)   | 0 (0.0)   | 11 (9.5)  | 2 (3.9)   | 26 (8.7)   |         |
|                                                                                | No change          | 15 (31.9) | 13 (29.5) | 11 (26.2) | 32 (27.6) | 19 (37.3) | 90 (30.0)  |         |
|                                                                                | Slightly positive  | 19 (40.4) | 20 (45.5) | 24 (57.1) | 51 (44.0) | 17 (33.3) | 131 (43.7) |         |
|                                                                                | Extremely positive | 4 (8.5)   | 7 (15.9)  | 7 (16.7)  | 20 (17.2) | 13 (25.4) | 51 (17.0)  |         |
| How has access to services changed                                             | Extremely negative | 11 (23.4) | 1 (2.3)   | 0 (0.0)   | 8 (6.8)   | 1 (2.0)   | 21 (7.0)   |         |
|                                                                                | Slightly negative  | 14 (29.8) | 13 (29.5) | 6 (14.3)  | 27 (22.9) | 13 (26.5) | 73 (24.3)  |         |
|                                                                                | No change          | 9 (19.1)  | 11 (25.0) | 12 (28.6) | 27 (22.9) | 10 (20.4) | 69 (23.0)  |         |
|                                                                                | Slightly positive  | 11 (23.4) | 15 (34.1) | 20 (47.6) | 49 (41.5) | 17 (34.7) | 112 (37.3) |         |

|                                                                                                                   |                            |           |           |           |           |           |            |      |
|-------------------------------------------------------------------------------------------------------------------|----------------------------|-----------|-----------|-----------|-----------|-----------|------------|------|
|                                                                                                                   | Extremely positive         | 2 (4.3)   | 4 (9.1)   | 4 (9.5)   | 7 (5.9)   | 8 (16.3)  | 25 (8.3)   |      |
| <b>How has digital inclusion changed</b>                                                                          | Extremely negative         | 2 (4.3)   | 2 (4.5)   | 0 (0.0)   | 2 (1.7)   | 1 (2.0)   | 7 (2.3)    |      |
|                                                                                                                   | Slightly negative          | 5 (10.6)  | 6 (13.6)  | 3 (7.1)   | 16 (13.8) | 6 (12.2)  | 36 (12.1)  |      |
|                                                                                                                   | No change                  | 8 (17.0)  | 12 (27.3) | 11 (26.2) | 35 (30.2) | 17 (34.7) | 83 (27.9)  |      |
|                                                                                                                   | Slightly positive          | 28 (59.6) | 22 (50.0) | 22 (52.4) | 53 (45.7) | 23 (46.9) | 148 (49.7) |      |
|                                                                                                                   | Extremely positive         | 4 (8.5)   | 2 (4.5)   | 6 (14.3)  | 10 (8.6)  | 2 (4.1)   | 24 (8.1)   |      |
| <b>How has covid changed workforce configuration</b>                                                              | Extremely negative         | 6 (12.8)  | 1 (2.3)   | 0 (0.0)   | 3 (2.5)   | 1 (2.0)   | 11 (3.7)   |      |
|                                                                                                                   | Slightly negative          | 15 (31.9) | 9 (20.9)  | 2 (4.8)   | 21 (17.8) | 8 (16.3)  | 55 (18.4)  |      |
|                                                                                                                   | No change                  | 10 (21.3) | 14 (32.6) | 15 (35.7) | 48 (40.7) | 23 (46.9) | 110 (36.8) |      |
|                                                                                                                   | Slightly positive          | 15 (31.9) | 16 (37.2) | 16 (38.1) | 37 (31.4) | 13 (26.5) | 97 (32.4)  |      |
|                                                                                                                   | Extremely positive         | 1 (2.1)   | 3 (7.0)   | 9 (21.4)  | 9 (7.6)   | 4 (8.2)   | 26 (8.7)   |      |
| <b>How has covid changed training of professionals</b>                                                            | Extremely negative         | 4 (8.5)   | 2 (4.8)   | 0 (0.0)   | 5 (4.3)   | 0 (0.0)   | 11 (3.7)   |      |
|                                                                                                                   | Slightly negative          | 10 (21.3) | 3 (7.1)   | 1 (2.4)   | 13 (11.3) | 5 (10.2)  | 32 (10.8)  |      |
|                                                                                                                   | No change                  | 14 (29.8) | 9 (21.4)  | 15 (35.7) | 50 (43.5) | 22 (44.9) | 110 (37.3) |      |
|                                                                                                                   | Slightly positive          | 18 (38.3) | 23 (54.8) | 20 (47.6) | 38 (33.0) | 19 (38.8) | 118 (40.0) |      |
|                                                                                                                   | Extremely positive         | 1 (2.1)   | 5 (11.9)  | 6 (14.3)  | 9 (7.8)   | 3 (6.1)   | 24 (8.1)   |      |
| <b>How has covid changed the design &amp; cost of commissioned services</b>                                       | Extremely negative         | 7 (15.2)  | 0 (0.0)   | 0 (0.0)   | 10 (8.5)  | 1 (2.0)   | 18 (6.0)   |      |
|                                                                                                                   | Slightly negative          | 11 (23.9) | 10 (23.3) | 6 (14.3)  | 18 (15.4) | 8 (16.0)  | 53 (17.8)  |      |
|                                                                                                                   | No change                  | 14 (30.4) | 13 (30.2) | 19 (45.2) | 54 (46.2) | 23 (46.0) | 123 (41.3) |      |
|                                                                                                                   | Slightly positive          | 12 (26.1) | 16 (37.2) | 13 (31.0) | 32 (27.4) | 16 (32.0) | 89 (29.9)  |      |
|                                                                                                                   | Extremely positive         | 2 (4.3)   | 4 (9.3)   | 4 (9.5)   | 3 (2.6)   | 2 (4.0)   | 15 (5.0)   |      |
| <b>LOOKING FORWARD</b>                                                                                            |                            |           |           |           |           |           |            | 0.70 |
| <b>I am likely to continue to deliver self-care practices which I introduced as a result of the pandemic</b>      | Strongly disagree          | 0 (0.0)   | 0 (0.0)   | 1 (2.4)   | 1 (0.8)   | 0 (0.0)   | 2 (0.7)    |      |
|                                                                                                                   | Disagree                   | 0 (0.0)   | 0 (0.0)   | 0 (0.0)   | 1 (0.8)   | 1 (2.0)   | 2 (0.7)    |      |
|                                                                                                                   | Neither agree nor disagree | 5 (10.6)  | 6 (13.6)  | 2 (4.8)   | 15 (12.6) | 7 (13.7)  | 35 (11.6)  |      |
|                                                                                                                   | Agree                      | 21 (44.7) | 14 (31.8) | 20 (47.6) | 59 (49.6) | 21 (41.2) | 135 (44.6) |      |
|                                                                                                                   | Strongly agree             | 21 (44.7) | 24 (54.5) | 19 (45.2) | 43 (36.1) | 22 (41.1) | 129 (42.6) |      |
| <b>I will continue to actively promote self-care resources</b>                                                    | Strongly disagree          | 0 (0.0)   | 0 (0.0)   | 0 (0.0)   | 1 (0.8)   | 0 (0.0)   | 1 (0.3)    |      |
|                                                                                                                   | Disagree                   | 0 (0.0)   | 0 (0.0)   | 0 (0.0)   | 0 (0.0)   | 0 (0.0)   | 0 (0.0)    |      |
|                                                                                                                   | Neither agree nor disagree | 1 (2.1)   | 1 (2.3)   | 3 (7.1)   | 1 (0.8)   | 3 (5.9)   | 9 (3.0)    |      |
|                                                                                                                   | Agree                      | 16 (34.0) | 17 (38.6) | 17 (40.5) | 59 (49.6) | 20 (39.2) | 129 (42.6) |      |
|                                                                                                                   | Strongly agree             | 30 (63.8) | 26 (59.1) | 22 (52.4) | 58 (48.7) | 28 (54.9) | 164 (54.1) |      |
| <b>My patients will be more likely to practice self-care</b>                                                      | Strongly disagree          | 1 (2.2)   | 0 (0.0)   | 0 (0.0)   | 2 (1.7)   | 0 (0.0)   | 3 (1.0)    |      |
|                                                                                                                   | Disagree                   | 9 (19.6)  | 3 (6.8)   | 3 (7.1)   | 7 (5.9)   | 1 (2.0)   | 23 (7.6)   |      |
|                                                                                                                   | Neither agree nor disagree | 12 (26.1) | 17 (38.6) | 16 (38.1) | 38 (31.9) | 17 (33.3) | 100 (33.1) |      |
|                                                                                                                   | Agree                      | 22 (47.8) | 19 (43.2) | 20 (47.6) | 62 (52.1) | 27 (42.9) | 150 (49.7) |      |
|                                                                                                                   | Strongly agree             | 2 (4.3)   | 5 (11.4)  | 3 (7.1)   | 10 (8.4)  | 6 (11.8)  | 26 (8.6)   |      |
| <b>My patients will be better equipped &amp; feel more empowered to partake in self-care practices</b>            | Strongly disagree          | 2 (4.3)   | 0 (0.0)   | 0 (0.0)   | 1 (0.8)   | 0 (0.0)   | 3 (1.0)    |      |
|                                                                                                                   | Disagree                   | 9 (19.1)  | 3 (6.8)   | 3 (7.1)   | 10 (8.4)  | 2 (3.9)   | 27 (8.9)   |      |
|                                                                                                                   | Neither agree nor disagree | 12 (25.5) | 17 (38.6) | 13 (31.0) | 36 (30.3) | 19 (37.3) | 97 (32.0)  |      |
|                                                                                                                   | Agree                      | 20 (42.6) | 19 (43.2) | 22 (52.4) | 67 (56.3) | 21 (41.2) | 149 (49.2) |      |
|                                                                                                                   | Strongly agree             | 4 (8.5)   | 5 (11.4)  | 4 (9.5)   | 5 (4.2)   | 9 (17.6)  | 27 (8.9)   |      |
| <b>There will be a stronger adherence to self-care practices as a first option of care following the pandemic</b> | Strongly disagree          | 3 (6.4)   | 0 (0.0)   | 0 (0.0)   | 3 (2.5)   | 0 (0.0)   | 6 (2.0)    |      |
|                                                                                                                   | Disagree                   | 12 (25.5) | 3 (6.8)   | 3 (7.1)   | 9 (7.6)   | 7 (13.7)  | 34 (11.3)  |      |
|                                                                                                                   | Neither agree nor disagree | 11 (23.4) | 14 (31.8) | 13 (31.0) | 45 (38.1) | 15 (29.4) | 98 (32.5)  |      |
|                                                                                                                   | Agree                      | 18 (38.3) | 23 (52.3) | 20 (47.6) | 53 (44.9) | 21 (41.2) | 135 (44.7) |      |

|                                                         |                            |               |              |                |                 |                 |              |                |
|---------------------------------------------------------|----------------------------|---------------|--------------|----------------|-----------------|-----------------|--------------|----------------|
| The pandemic has made the 'absolute case' for self-care | Strongly agree             | 3 (6.4)       | 4 (9.1)      | 6 (14.3)       | 8 (6.8)         | 8 (15.7)        | 29 (9.6)     |                |
|                                                         | Strongly disagree          | 1 (2.1)       | 0 (0.0)      | 0 (0.0)        | 0 (0.0)         | 3 (5.9)         | 4 (1.3)      |                |
|                                                         | Disagree                   | 8 (17.0)      | 2 (4.5)      | 1 (2.4)        | 10 (8.4)        | 3 (5.9)         | 24 (7.9)     |                |
|                                                         | Neither agree nor disagree | 9 (19.1)      | 8 (18.2)     | 11 (26.2)      | 19 (16.0)       | 11 (21.6)       | 58 (19.1)    |                |
|                                                         | Agree                      | 12 (25.5)     | 20 (45.5)    | 20 (47.6)      | 66 (55.5)       | 20 (39.2)       | 138 (45.5)   |                |
| I will personally be more likely to practice self-care  | Strongly agree             | 17 (36.2)     | 14 (31.8)    | 10 (23.8)      | 24 (20.2)       | 14 (27.5)       | 79 (26.1)    |                |
|                                                         | Strongly disagree          | 0 (0.0)       | 0 (0.0)      | 0 (0.0)        | 0 (0.0)         | 0 (0.0)         | 0 (0.0)      |                |
|                                                         | Disagree                   | 3 (6.4)       | 0 (0.0)      | 0 (0.0)        | 2 (1.7)         | 1 (2.0)         | 6 (2.0)      |                |
|                                                         | Neither agree nor disagree | 18 (38.3)     | 8 (18.6)     | 8 (20.0)       | 27 (22.7)       | 8 (15.7)        | 69 (23.0)    |                |
|                                                         | Agree                      | 14 (29.8)     | 20 (46.5)    | 16 (40.0)      | 49 (41.2)       | 29 (56.9)       | 128 (42.7)   |                |
|                                                         | Strongly agree             | 12 (25.5)     | 15 (34.9)    | 16 (40.0)      | 41 (34.5)       | 13 (25.5)       | 97 (32.3)    |                |
|                                                         |                            | <b>Doctor</b> | <b>Nurse</b> | <b>Service</b> | <b>Pharmacy</b> | <b>SP/Other</b> | <b>Total</b> | <b>p-value</b> |
| <b>USE OF TECHNOLOGY DURING THE PANDEMIC</b>            |                            |               |              |                |                 |                 |              | 0.26           |
| Email                                                   | Reduced significantly      | 0 (0.0)       | 0 (0.0)      | 1 (2.4)        | 1 (0.9)         | 0 (0.0)         | 2 (0.7)      |                |
|                                                         | Reduced slightly           | 2 (4.5)       | 2 (4.5)      | 1 (2.4)        | 0 (0.0)         | 0 (0.0)         | 3 (1.0)      |                |
|                                                         | No change                  | 13 (29.5)     | 13 (29.5)    | 10 (24.4)      | 40 (34.5)       | 13 (26.0)       | 85 (28.4)    |                |
|                                                         | Increased slightly         | 19 (43.2)     | 19 (43.2)    | 16 (39.0)      | 43 (37.1)       | 18 (36.0)       | 121 (40.5)   |                |
|                                                         | Increased significantly    | 10 (22.7)     | 10 (22.7)    | 13 (31.7)      | 32 (27.6)       | 19 (38.0)       | 88 (29.4)    |                |
| <b>Total</b>                                            |                            | 48 (100.0)    | 44 (100.0)   | 41 (100.0)     | 116 (100.0)     | 50 (100.0)      | 299 (100.0)  |                |
| Text Messaging (SMS)                                    | Reduced significantly      | 0 (0.0)       | 0 (0.0)      | 0 (0.0)        | 0 (0.0)         | 0 (0.0)         | 0 (0.0)      |                |
|                                                         | Reduced slightly           | 0 (0.0)       | 1 (2.4)      | 0 (0.0)        | 1 (0.9)         | 0 (0.0)         | 2 (0.7)      |                |
|                                                         | No change                  | 3 (6.3)       | 15 (35.7)    | 20 (51.3)      | 34 (29.3)       | 17 (35.4)       | 89 (30.4)    |                |
|                                                         | Increased slightly         | 11 (22.9)     | 14 (33.3)    | 11 (28.2)      | 46 (39.7)       | 17 (35.4)       | 99 (33.8)    |                |
|                                                         | Increased significantly    | 34 (70.8)     | 12 (28.6)    | 8 (20.5)       | 35 (30.2)       | 14 (29.2)       | 103 (35.2)   |                |
| <b>Total</b>                                            |                            | 48 (100.0)    | 42 (100.0)   | 39 (100.0)     | 116 (100.0)     | 48 (100.0)      | 293 (100.0)  |                |
| Telephone                                               | Increased significantly    | 0 (0.0)       | 0 (0.0)      | 0 (0.0)        | 0 (0.0)         | 1 (2.0)         | 1 (0.3)      |                |
|                                                         | Increased slightly         | 0 (0.0)       | 1 (2.3)      | 0 (0.0)        | 0 (0.0)         | 0 (0.0)         | 1 (0.3)      |                |
|                                                         | No change                  | 7 (14.6)      | 7 (15.9)     | 2 (5.0)        | 39 (33.6)       | 6 (12.2)        | 61 (20.5)    |                |
|                                                         | Reduced slightly           | 21 (43.8)     | 13 (29.5)    | 11 (27.5)      | 29 (25.0)       | 19 (38.8)       | 93 (31.3)    |                |
|                                                         | Reduced significantly      | 20 (41.7)     | 23 (52.3)    | 27 (67.5)      | 48 (41.4)       | 23 (46.9)       | 141 (47.5)   |                |
| <b>Total</b>                                            |                            | 48 (100.0)    | 44 (100.0)   | 40 (100.0)     | 116 (100.0)     | 49 (100.0)      | 297 (100.0)  |                |
| Recommending Online Resources                           | Reduced significantly      | 0 (0.0)       | 1 (2.3)      | 1 (2.4)        | 1 (0.9)         | 0 (0.0)         | 3 (1.0)      |                |
|                                                         | Reduced slightly           | 0 (0.0)       | 2 (4.7)      | 2 (4.9)        | 3 (2.6)         | 0 (0.0)         | 7 (2.4)      |                |
|                                                         | No change                  | 4 (8.5)       | 6 (14.0)     | 6 (14.6)       | 8 (6.8)         | 7 (14.3)        | 31 (10.4)    |                |
|                                                         | Increased slightly         | 8 (17.0)      | 13 (30.2)    | 13 (31.7)      | 34 (29.1)       | 15 (30.6)       | 83 (27.9)    |                |
|                                                         | Increased significantly    | 35 (74.5)     | 21 (48.8)    | 19 (46.3)      | 71 (60.7)       | 27 (55.1)       | 173 (58.2)   |                |
| <b>Total</b>                                            |                            | 47 (100.0)    | 43 (100.0)   | 41 (100.0)     | 117 (100.0)     | 49 (100.0)      | 297 (100.0)  |                |
| Home Monitoring                                         | Reduced significantly      | 0 (0.0)       | 0 (0.0)      | 0 (0.0)        | 0 (0.0)         | 0 (0.0)         | 0 (0.0)      |                |
|                                                         | Reduced slightly           | 0 (0.0)       | 0 (0.0)      | 1 (2.6)        | 0 (0.0)         | 0 (0.0)         | 1 (0.3)      |                |
|                                                         | No change                  | 4 (8.3)       | 17 (39.5)    | 24 (63.2)      | 26 (22.4)       | 26 (57.8)       | 97 (33.4)    |                |
|                                                         | Increased slightly         | 21 (43.8)     | 11 (25.6)    | 8 (21.1)       | 51 (44.0)       | 11 (24.4)       | 102 (35.2)   |                |
|                                                         | Increased significantly    | 23 (47.9)     | 15 (34.9)    | 5 (13.2)       | 39 (33.6)       | 8 (17.8)        | 90 (31.0)    |                |
| <b>Total</b>                                            |                            | 48 (100.0)    | 43 (100.0)   | 38 (100.0)     | 116 (100.0)     | 45 (100.0)      | 290 (100.0)  |                |
| Remote Monitoring by the Care Team                      | Reduced significantly      | 1 (2.1)       | 1 (2.4)      | 0 (0.0)        | 1 (0.9)         | 0 (0.0)         | 3 (1.0)      |                |
|                                                         | Reduced slightly           | 1 (2.1)       | 1 (2.4)      | 1 (2.6)        | 2 (1.7)         | 3 (6.5)         | 8 (2.7)      |                |

|                        |                         |            |            |            |             |            |             |  |
|------------------------|-------------------------|------------|------------|------------|-------------|------------|-------------|--|
|                        | No change               | 11 (22.9)  | 13 (31.0)  | 13 (33.3)  | 42 (36.2)   | 24 (52.2)  | 103 (35.4)  |  |
|                        | Increased slightly      | 21 (43.8)  | 16 (38.1)  | 15 (38.5)  | 40 (34.5)   | 10 (21.7)  | 102 (35.1)  |  |
|                        | Increased significantly | 14 (29.2)  | 11 (26.2)  | 10 (25.6)  | 31 (26.7)   | 9 (19.6)   | 75 (25.8)   |  |
| <b>Total</b>           |                         | 48 (100.0) | 42 (100.0) | 39 (100.0) | 116 (100.0) | 46 (100.0) | 291 (100.0) |  |
| Use of Smartphone Apps | Reduced significantly   | 0 (0.0)    | 0 (0.0)    | 0 (0.0)    | 0 (0.0)     | 0 (0.0)    | 0 (0.0)     |  |
|                        | Reduced slightly        | 0 (0.0)    | 1 (2.3)    | 0 (0.0)    | 0 (0.0)     | 1 (2.1)    | 2 (0.7)     |  |
|                        | No change               | 16 (33.3)  | 11 (25.6)  | 10 (26.3)  | 20 (17.9)   | 7 (14.6)   | 64 (22.1)   |  |
|                        | Increased slightly      | 19 (39.6)  | 20 (46.5)  | 18 (47.4)  | 51 (45.5)   | 25 (52.1)  | 133 (46.0)  |  |
|                        | Increased significantly | 13 (27.1)  | 11 (25.6)  | 10 (26.3)  | 41 (36.6)   | 15 (31.3)  | 90 (31.1)   |  |
| <b>Total</b>           |                         | 48 (100.0) | 43 (100.0) | 38 (100.0) | 112 (100.0) | 48 (100.0) | 289 (100.0) |  |
